# Supplementary material for: A Pipeline for Screening Small Molecules with Growth Inhibitory Activity against Burkholderia cenocepacia
Source: PLOS journal article supplement (doi:10.1371/journal.pone.0128587), 2015-06-08

A

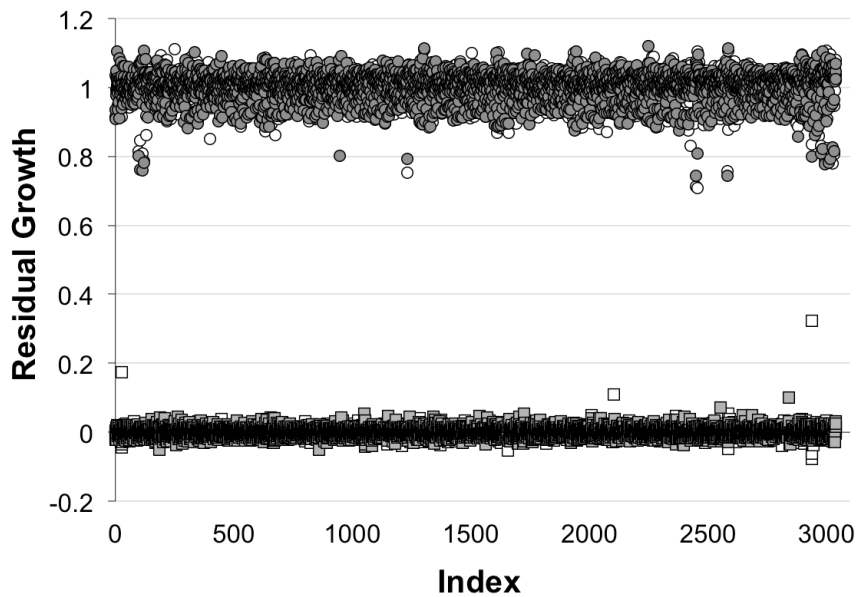

B

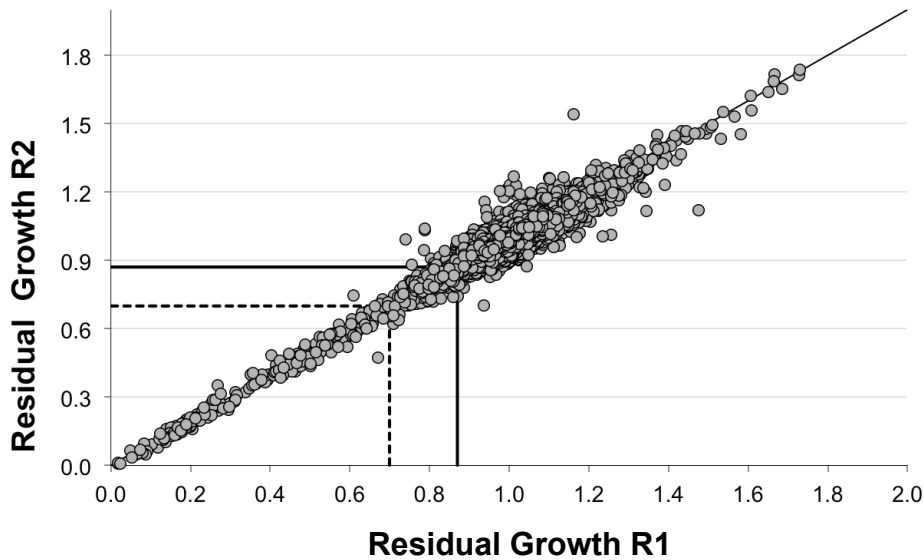

Supplement: S2 (10.1371/journal.pone.0128587.s002) [file journal.pone.0128587.s002]
