# Supplementary material for: A Pipeline for Screening Small Molecules with Growth Inhibitory Activity against Burkholderia cenocepacia
Source: PLOS journal article supplement (doi:10.1371/journal.pone.0128587), 2015-06-08
Supplement: S3 (10.1371/journal.pone.0128587.s003) [file journal.pone.0128587.s003]

**S1 Table. Canadian Compound Collection (CYCC) Library**

| <b>Subset</b>                                                                                 | <b>Number of compounds</b> | <b>Description</b>                                                       |
|-----------------------------------------------------------------------------------------------|----------------------------|--------------------------------------------------------------------------|
| <b>Custom Library</b><br>(Maybridge, Ltd. Cornwall, UK)                                       | 16,000                     | Synthetic small molecules;<br>Average MW = 325 g/mol                     |
| <b>DIVERSet</b><br>(ChemBridge Corp., San Diego, CA, USA)                                     | 9,989                      | Synthetic small molecules;<br>Average MW = 325 g/mol                     |
| <b>Prestwick Chemical Library</b><br>(Prestwick Chemical, Illkirch, France)                   | 1,120                      | Off-patent small molecules; >85% FDA approved;<br>Average MW = 325 g/mol |
| <b>Natural Products Library</b><br>(BIOMOL International, L.P., Plymouth Meeting, PA, USA)    | 361                        | Natural products;<br>Average MW = 350 g/mol                              |
| <b>Lopac1280 (International Version)</b><br>(Sigma-Aldrich Canada Ltd., Oakville, ON, Canada) | 885                        | Pharmacologically active small molecules;<br>Average MW = 350 g/mol      |
| <b>Spectrum Collection</b><br>(MicroSource Discovery Systems, Inc., Gaylordsville, CT, USA)   | 1,214                      | Natural products and bioactives; average MW = 350 g/mol                  |
| <b>Dennis Hall Compounds</b><br>Chem. Dept., University of Alberta                            | 690                        | Synthesized lactams, lactones and piperidines                            |
| <b>Total # compounds</b>                                                                      | 30,259                     |                                                                          |
